# Supplementary material
Source: ML conference proceedings conference paper supplement (https://openreview.net/forum?id=TGUp8EaCGj9)
Supplement: supplementary_material [file attachment]

# 1 Appendix

## 2 1.1 Comparison to Offline DAU

3 Within this paper we focus on mixing smaller frequencies together with larger frequencies. Prior  
4 work has identified that training deep q-learning on even one frequency can be challenging as fre-  
5 quencies become smaller [1]. To understand what portion of the mixing challenge is due to instabil-  
6 ity at smaller frequencies, as opposed to frequency inconsistencies, we implement an offline variant  
7 of Deep Advantage Updating (DAU). We replace the learned  $Q$ -values with advantage functions  
8 that have a limit as  $\delta t \rightarrow 0$ . We try both the default DAU implementation and also an offline mod-  
9 ification of DAU where we add all of the additional CQL losses applied to the advantage function  
10 with a CQL alpha value of 5. On the FrankaKitchen environment, both DAU variants achieve a final  
11 performance of 0.0.

12 The failure of DAU is likely explained by its incompatibility with the CQL objective. Recall that in  
13 the approximate advantage formulation of DAU, the value and advantage networks are updated with  
14 the following loss:

$$\begin{aligned} Q^i &\leftarrow V_\theta(s_i) + \delta t(\bar{A}_\psi(s^i, a^i) - \max_a \bar{A}_\psi(s^i, a)) \\ \tilde{Q}^i &\leftarrow r^i \delta t + (1 - d^i) \gamma^{\delta t} V_\theta(s^{i+1}) \\ \mathcal{L} &= \|Q^i - \tilde{Q}^i\|_2^2 \end{aligned}$$

15 In practice  $\tilde{Q}^i$  is a target network updated with Polyak averaging, so the effect of this loss in an  
16 offline setting is to minimize  $\bar{A}_\psi(s^i, a^i)$  and maximize  $\max_a \bar{A}_\psi(s^i, a)$ . This directly contradicts  
17 the CQL objective, which enforces pessimism on actions that maximize  $Q$ -values and optimism on  
18 actions within the replay buffer. We believe this conflict is why DAU fails. Further research is  
19 necessary to come up with a robust version of offline DAU. We'll include these comparisons in the  
20 final version of the paper and discuss the applicability of DAU to the offline RL setting.

## 21 1.2 Interpolation and Extrapolation of Learned Policies

22 To study the robustness of the learned policies across a range of discretizations, we perform inference  
23 across a range of unseen discretizations for both the Kitchen and Pendulum environments. Table 1  
24 shows that Adaptive  $N$ -step achieves reasonable performance when evaluated on new  $\delta t$ .

| Env Name            | In Training Data? | $\delta t$ | Adaptive N-step |
|---------------------|-------------------|------------|-----------------|
| pendulum            | Yes               | 10         | 89.5 $\pm$ 8.1  |
|                     | No                | 9          | 86.7 $\pm$ 10.3 |
|                     | No                | 8          | 86.7 $\pm$ 10.3 |
|                     | No                | 7          | 100.0 $\pm$ 0.0 |
|                     | No                | 6          | 86.7 $\pm$ 10.3 |
|                     | Yes               | 5          | 92.9 $\pm$ 5.7  |
|                     | No                | 4          | 66.7 $\pm$ 25.8 |
|                     | No                | 3          | 100.0 $\pm$ 0.0 |
|                     | Yes               | 2          | 100.0 $\pm$ 0.0 |
|                     | Yes               | 1          | 87.5 $\pm$ 7.5  |
| kitchen-complete-v0 | No                | 45         | 15 $\pm$ 14.8   |
|                     | Yes               | 40         | 34.6 $\pm$ 8.7  |
|                     | No                | 35         | 28 $\pm$ 11.8   |
|                     | Yes               | 30         | 19.9 $\pm$ 7.2  |
|                     | No                | 25         | 2.2 $\pm$ 1.96  |

Table 1: Adaptive  $N$ -Step maintains strong performance when interpolating across unseen  $\delta t$  and even exhibits some degree of extrapolation to  $\delta t$  outside the range of the training data.

| Env Name            | Policy Conditioning      | $\delta t$ | Adaptive N-step |
|---------------------|--------------------------|------------|-----------------|
| kitchen-complete-v0 | $\pi_{\delta t=40}(a s)$ | 40         | $48.3 \pm 3.3$  |
|                     | $\pi_{\delta t=30}(a s)$ | 40         | $21.1 \pm 6.5$  |
|                     | $\pi_{\delta t=30}(a s)$ | 30         | $16.6 \pm 8.6$  |
|                     | $\pi_{\delta t=40}(a s)$ | 30         | $11.7 \pm 14.2$ |

Table 2: When a policy is conditioned on a different frequency than is observed during evaluation, performance drops. This suggests that Adaptive  $N$ -Step is able to learn to specialize to different frequencies.

### 25 1.3 Learning Different Policies for Different Frequencies

26 One challenge with learning optimal policies for different frequencies is that that optimal policy for  
 27 one frequency may not be optimal at another frequency. To understand if Adaptive  $N$ -Step differ-  
 28 entiates between policies at different frequencies, we conduct an experiment where we condition  
 29 on a different frequency than is observed during evaluation. Table 2 shows that performance drops  
 30 for policies evaluated outside of the training frequency, suggesting that Adaptive  $N$ -Step is able to  
 31 specialize to different frequencies with  $\delta t$  conditioning.

### 32 1.4 Performance Curves by $\delta t$

33 In this section, we provide performance curves broken down by  $\delta t$  for each task to understand how  
 34 Adaptive  $N$ -Step impacts discretizations that have better data or are less stable to train.

35 **Pendulum.** We plot performance by discretization on the Pendulum task in Figure 1. For every  
 36  $\delta t$ , Adaptive  $N$ -Step provides substantial improvement over naïve mixing. Because pendulum is a  
 37 sparse reward task with a simple state-action space, larger values of  $N$  should propagate value more  
 38 quickly than Adaptive  $N$ -Step Returns. For example, the Adaptive  $N$  for  $\delta t = 0.005, 0.01$ , and  
 39  $0.02$  is  $N = 4, 2$ , and  $1$ , respectively. However, for  $\delta t = 0.005$ , performance declines with max  $N$   
 40 even though the value of  $N$  used for that discretization is unchanged. Likewise for  $\delta t = 0.01$  and  
 41  $\delta t = 0.02$ , the value of  $N$  is not correlated with performance in that discretization. These results  
 42 suggest that more than the absolute choice of  $N$  matters for performance.

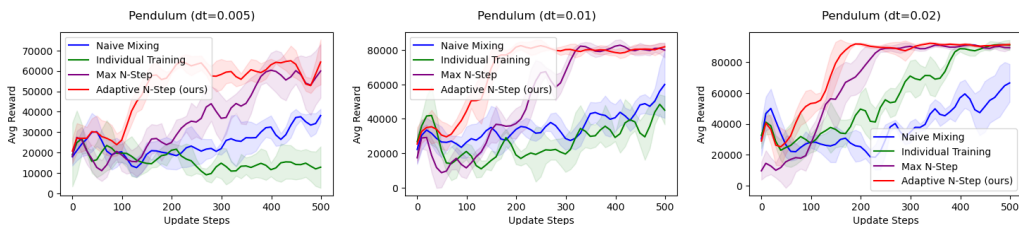

Figure 1: Pendulum performance during training for each  $\delta t$ .

43 **Meta-World Door-Open.** We plot performance by discretization on the Meta-World task in Figure 2.  
 44 Within the door-open task, Adaptive  $N$ -Step returns improves the training stability on the smallest  
 45 discretization  $\delta t = 1$  without compromising final performance on coarser discretizations. In this  
 46 setting naïve mixing fails to stably learn a well-performing policy at the smallest discretization.

47 **Kitchen.** We plot performance by discretization on the four FrankaKitchen tasks in Figure 3. Similar  
 48 to Pendulum, the performance on FrankaKitchen is not fully explained by the absolute value of  $N$   
 49 chosen for each discretization. For  $\delta t = 30$ , the same value of  $N$  is used for Adaptive  $N$ -Step  
 50 Returns and Max  $N$ -Step Returns, but Adaptive  $N$  still sees a performance gain. Using any  $N$ -step  
 51 return formulation sees a significant improvement over Naïve Mixing.

### 52 1.5 Visualizing the Learned $Q$ -Values

53 We visualize how Adaptive  $N$ -Step Returns affect the quality of the learned  $Q$ -function.

54 **Pendulum.** In Figure 4, we plot the  $Q$ -value over the complete state space of the Pendulum envi-  
 55 ronment for each  $\delta t$  at the end of training. The x-axis is the angle and the y-axis is the velocity of

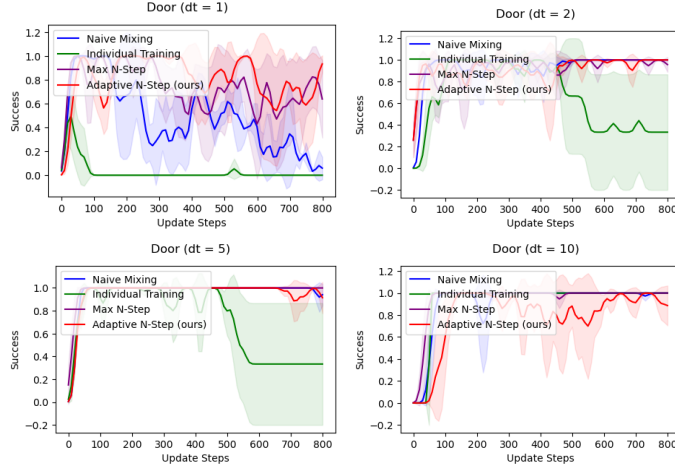

Figure 2: Door-open performance during training for each  $\delta t$ .

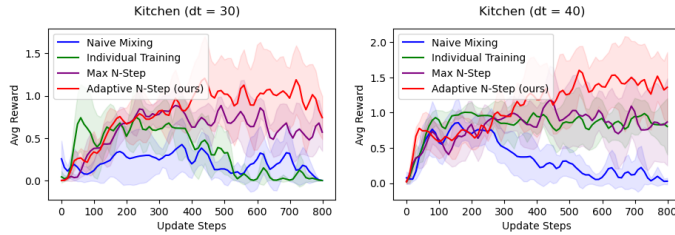

Figure 3: Kitchen performance during training for each  $\delta t$ .

56 the pendulum. For each state, we measure the  $Q$ -value on the action predicted by the final policy.  
 57 Intuitively, we expect a policy that attains high reward to predict larger  $Q$ -values along the lines  
 58  $y = x$  and  $y = -x$ , since the velocity of the pendulum should be proportional to its distance from  
 59 the balance position.

60 Both Naïve Mixing and Adaptive  $N$ -Step converge to similar average  $Q$ -values by the end of train-  
 61 ing, but Adaptive  $N$ -Step learns a cleaner  $Q$ -value over the state space. This suggests that even  
 62 though the final  $Q$ -values are similar across discretizations with and without adaptive  $N$ -step, mix-  
 63 ing data without  $N$ -step corrodes the quality of the learned  $Q$ -value

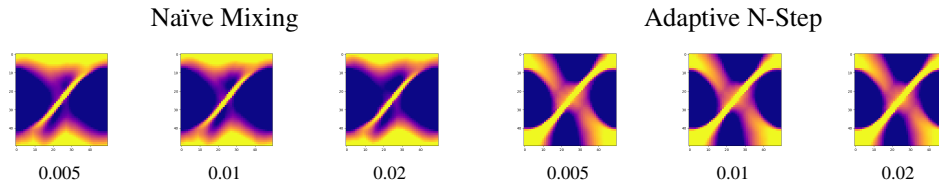

Figure 4: We visualize the  $Q$ -values across the entire state-action space for each  $\delta t$  at the end of training. The x-axis is the angle of the pendulum and the y-axis is the angular velocity. The quality of the learned value function is corroded with Naïve Mixing, but not with Adaptive  $N$ -step.

64 **Meta-World Door-Open.** In Figure 5, we plot the  $Q$ -value (middle) for the Meta-World door-  
 65 open task at a discretization of 1 alongside images taken at regular intervals from the trajectory  
 66 (top) and the reward attained by the agent (bottom). The  $Q$ -values learned with Naïve mixing (left)  
 67 experience a slight dip with task progress before diverging towards a large negative number. The  
 68  $Q$ -values learning with Adaptive  $N$ -Step (right) progress more closely with task progress and the  
 69 policy is able to complete the task successfully.

70 **Kitchen.** In Figure 6, we plot the  $Q$ -value (middle) for the Kitchen environment at a discretization  
 71 of 40 alongside images taken at regular intervals from the trajectory (top) and the reward attained

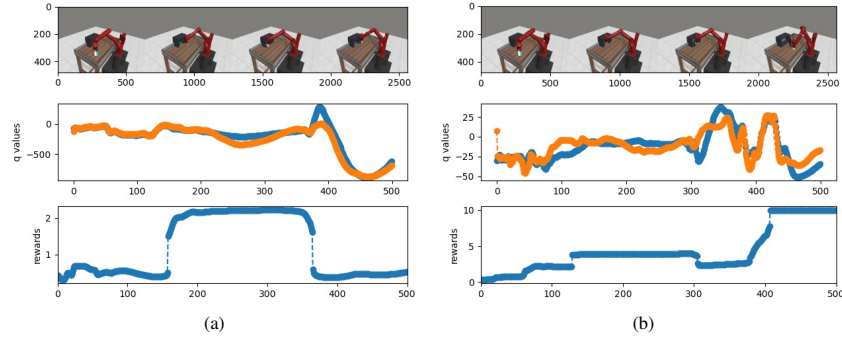

Figure 5: We visualize both  $Q$ -values (blue and orange) for each step of the trajectory for the door open task trained without (left) and with (right) adaptive n-step.

72 by the agent (bottom). On the left-hand side, we see that at the starting state, the  $Q$ -value trained  
 73 with Naïve Mixing predicts large values at the initial state and then diminishes as the robot moves  
 74 farther from the interactive task elements. On the right-hand side, we see that, although the  $Q$ -value  
 75 is slightly negative, it correlates well with attained reward. Towards the middle of the trajectory, it  
 76 still attains a high reward as it moves closer to interactive task elements (i.e., back to the microwave)  
 77 and continues to drop as the robot moves away from these elements at the end of the trajectory.

## 78 1.6 Training and Evaluation Details

79 All plots and performance numbers are averaged over 5 evaluation trajectories. All Naïve Mixing  
 80 and Adaptive N-Steps results are averaged over 5 seeds. All Individual Training and Max N-Step  
 81 Results are averaged over 3 seeds. The plots in the appendix are presented with 95% confidence  
 82 intervals and smoothed with a 1-D Gaussian filter with a standard deviation of 1.

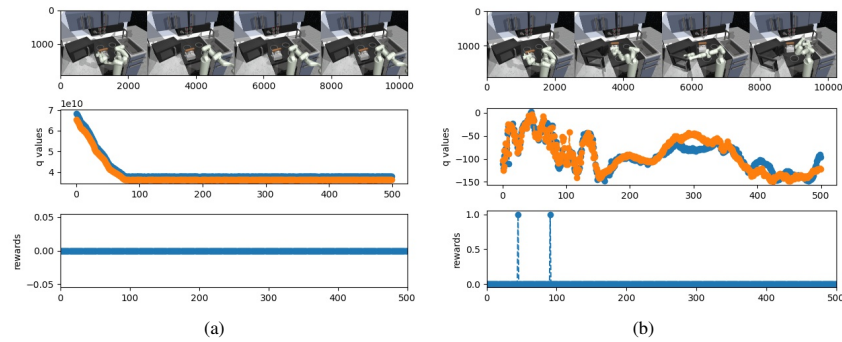

Figure 6: We visualize both  $Q$ -values (blue and orange) for each step of the trajectory for the FrankaKitchen environment trained without (left) and with (right) adaptive n-step.

83 **References**

- 84 [1] C. Tallec, L. Blier, and Y. Ollivier. Making deep q-learning methods robust to time discretiza-  
85 tion. In *International Conference on Machine Learning*, pages 6096–6104. PMLR, 2019.
